# Supplementary material
Source: Research Square preprint supplement (doi:10.21203/rs.3.rs-8989784/v1)
Supplement: Supplementary file 1 [file cd58d07d949d4493d1ac64cd.docx]

*Cancer Chemotherapy and Pharmacology*

**Supplementary Materials**

**Prediction of Neutropenia Risk Based on Exposure Information**

**Without Plasma Concentration Measurement in Pemetrexed‒Platinum‒Based Chemotherapy: A Modeling Approach Using Real-World Clinical Data.**

Kazunori Morita1,2,*, Keiichi Shigetome3,4,*, Haruka Narise3, Tetsuya Kaneko3,5, Naoto Soejima3, Ryota Tanaka6, Hirofumi Jono5,7, Hiroki Itoh6, Daisuke Kadowaki8, Koki Tokunaga1, Akitomo Shibata1, Harumi Tanoue1, Kazuya Ichikado2,9, Ayami Kajiwara-Morita3, Kentaro Oniki3, Junji Saruwatari3,†

1. Department of Pharmacy, Saiseikai Kumamoto Hospital, Kumamoto, Japan
2. Clinical Research Center, Saiseikai Kumamoto Hospital, Kumamoto, Japan
3. Division of Pharmacology and Therapeutics, Graduate School of Pharmaceutical Sciences, Kumamoto University, Kumamoto, Japan
4. Department of Psychiatry, School of Medicine, Dokkyo Medical University, Tochigi, Japan
5. Department of Pharmacy, Kumamoto University Hospital, Kumamoto, Japan
6. Department of Clinical Pharmacy, Oita University Hospital, Oita, Japan
7. Department of Clinical Pharmaceutical Sciences, Graduate School of Pharmaceutical Sciences, Kumamoto University, Kumamoto, Japan
8. Faculty of Pharmaceutical Sciences, Sojo University, Kumamoto, Japan
9. Division of Respiratory Medicine, Saiseikai Kumamoto Hospital, Kumamoto, Japan.

* These authors contributed equally to this work.

†**Corresponding author:**

Junji Saruwatari, Ph.D.

Division of Pharmacology & Therapeutics, Graduate School of Pharmaceutical Sciences, Kumamoto University, 5-1 Oe-honmachi, Chuo-ku, Kumamoto 862-0973, Japan

E-mail: junsaru@gpo.kumamoto-u.ac.jp

**Supplementary Table 1. Physicochemical and biochemical parameters used in the PBPK model**

| Property | Value | Reference |
| --- | --- | --- |
| Compound name | Pemetrexed |  |
| Molecular weight | 427.4 | https://pubchem.ncbi.nlm.nih.gov/compound/Pemetrexed1 |
| Fat-solubility (LogP) | -0.797 | Posada M, et al. 201522 |
| pKa (acid) | 3.23, 4.40 | Posada M, et al. 201522 |
| Fraction unbound plasma (*f*u) | 0.19 | Posada M, et al. 201522 |
| Solubility | 89.4 mg/mL | https://pubchem.ncbi.nlm.nih.gov/compound/Pemetrexed1 |
| GFR fraction | 4.50 | Fitted in PK-Sim |
| *K*m OAT3 | 18.2 μM | Posada M, et al. 201522 |
| *V*max OAT3 | 185 pmol/min per 106 cells | Posada M, et al. 201522 |

GFR, glomerular filtration rate; OAT3, organic anion transporter 3; PBPK, physiologically based pharmacokinetic.

**Supplementary Table 2. Evaluation of the predictive performance of the PBPK model without consideration for GFR levels**

| Clinical Trial | Dose  (mg/m2) | Route of  Administration |  | CL  (mL/min) | Cmax  (μg/mL) | AUC0–inf (μg·h/mL) |
| --- | --- | --- | --- | --- | --- | --- |
| Nakagawa K, et al. 200624 | 300 | i.v. infusion (10 min) | Predicted value | 85.4 | 64.9 | 106 |
|  |  |  | Observed value2 | 109 | 58.2 | 70.1 |
|  |  |  | AFE | 0.78 | 1.11 | 1.51 |
| Nakagawa K, et al. 200624 | 500 | i.v. infusion (10 min) | Predicted value | 84.8 | 108 | 178 |
|  |  |  | Observed value2 | 86.5 | 115 | 158 |
|  |  |  | AFE | 0.98 | 0.94 | 1.13 |
| Kavathiya K, et al. 201725 | 500 | i.v. infusion (10 min) | Predicted value | 3.64 | 113 | 231.65 |
|  |  |  | Observed value3 | 4.72 | 113 | 223.64 |
|  |  |  | AFE | 0.77 | 1.00 | 1.04 |
| Nakagawa K, et al. 200624 | 600 | i.v. infusion (10 min) | Predicted value | 84.1 | 130 | 214 |
|  |  |  | Observed value2 | 53.0 | 178 | 290 |
|  |  |  | AFE | 1.59 | 0.73 | 0.74 |
| Nakagawa K, et al. 200624 | 700 | i.v. infusion (10 min) | Predicted value | 84.1 | 152 | 250 |
|  |  |  | Observed value2 | 83.4 | 172 | 250 |
|  |  |  | AFE | 1.01 | 0.88 | 1.00 |
| Nakagawa K, et al. 200624 | 800 | i.v. infusion (10 min) | Predicted value | 84.1 | 174 | 287 |
|  |  |  | Observed value2 | 61.4 | 240 | 361 |
|  |  |  | AFE | 1.37 | 0.72 | 0.79 |
| Nakagawa K, et al. 200624 | 900 | i.v. infusion (10 min) | Predicted value | 84.1 | 196 | 323 |
|  |  |  | Observed value2 | 68.5 | 217 | 388 |
|  |  |  | AFE | 1.23 | 0.90 | 0.83 |
| Nakagawa K, et al. 200624 | 1000 | i.v. infusion (10 min) | Predicted value | 83.5 | 217 | 360 |
|  |  |  | Observed value2 | 79.3 | 269 | 382 |
|  |  |  | AFE | 1.05 | 0.81 | 0.94 |
| Nakagawa K, et al. 200624 | 1200 | i.v. infusion (10 min) | Predicted value | 83.5 | 261 | 433 |
|  |  |  | Observed value2 | 99.7 | 212 | 337 |
|  |  |  | AFE | 0.84 | 1.23 | 1.28 |
|  |  |  | Geometric mean  of AFE  (95% CI) | 1.04  (0.86–1.26) | 0.91  (0.80–1.05) | 1.00  (0.84–1.20) |

AFE, average fold error; AUC0–inf, area under the plasma concentration‒time curve from time zero to infinity; CI, confidence interval; CL, clearance; Cmax, maximum plasma concentration; GFR, glomerular filtration rate; i.v., intravenous; PBPK, physiologically based pharmacokinetic.

**Supplementary Table 3. Evaluation of the predictive performance of the PBPK model with consideration for GFR levels**

| Clinical Trial | GFR  (mL/min) | Dose  (mg/m2) | Route of  Administration |  | CL  (mL/min) | Cmax  (μg/mL) | AUC0–inf (μg·h/mL) |
| --- | --- | --- | --- | --- | --- | --- | --- |
| Mita AC, et al. 200626 | ≥ 80 | 500 | i.v. infusion (10 min) | Predicted value | 96.9 | 100 | 191 |
|  |  |  |  | Observed value4 | 93.2 | 131 | 188 |
|  |  |  |  | AFE | 1.04 | 0.76 | 1.02 |
| Mita AC, et al. 200626 | ≥ 80 | 600 | i.v. infusion (10 min) | Predicted value | 96.9 | 120 | 230 |
|  |  |  |  | Observed value4 | 95.0 | 153 | 228 |
|  |  |  |  | AFE | 1.02 | 0.78 | 1.01 |
| Mita AC, et al. 200626 | 60–79 | 500 | i.v. infusion (10 min) | Predicted value | 64.7 | 107 | 295 |
|  |  |  |  | Observed value4 | 69.6 | 136 | 228 |
|  |  |  |  | AFE | 0.93 | 0.79 | 1.29 |
| Mita AC, et al. 200626 | 60–79 | 600 | i.v. infusion (10 min) | Predicted value | 63.8 | 128 | 355 |
|  |  |  |  | Observed value4 | 58.1 | 138 | 373 |
|  |  |  |  | AFE | 1.10 | 0.93 | 0.95 |
| Mita AC, et al. 200626 | 40–59 | 400 | i.v. infusion (10 min) | Predicted value | 43.9 | 83.1 | 307 |
|  |  |  |  | Observed value4 | 54.4 | 94.9 | 235 |
|  |  |  |  | AFE | 0.81 | 0.88 | 1.31 |
| Mita AC, et al. 200626 | 40–59 | 500 | i.v. infusion (10 min) | Predicted value | 43.9 | 104 | 386 |
|  |  |  |  | Observed value4 | 54.7 | 91.4 | 300 |
|  |  |  |  | AFE | 0.80 | 1.14 | 1.29 |

AFE, average fold error; AUC0–inf, area under the plasma concentration‒time curve from time zero to infinity; CL, clearance; Cmax, maximum plasma concentration; GFR, glomerular filtration rate; i.v., intravenous; PBPK, physiologically based pharmacokinetic.

**Supplementary Table 4. Effects of the tested covariates on the objective values in univariate analysis**

| Tested covariates | | | ΔOFV | *P* value |
| --- | --- | --- | --- | --- |
| A1 | | |  |  |
| Regimen | | |  |  |
|  | Pemetrexed + Cisplatin vs. Pemetrexed + Carboplatin | | -2.559 | NS |
| Pemetrexed dose (mg) | | | -31.399 | < 0.001 |
| Pemetrexed dose per BSA (mg/m2) | | | -32.371 | < 0.001 |
| CL (mL/min): continuous variable | | | -2.993 | NS |
| CL (mL/min): categorical variable | | |  |  |
|  | < 50 vs. 50 ≤ | | 0 | NS |
|  | < 60 vs. 60 ≤ | | -0.332 | NS |
|  | < 70 vs. 70 ≤ | | -1.232 | NS |
| Cmax (μg/mL): continuous variable | | | -0.258 | NS |
| Cmax (μg/mL): categorical variable | | |  |  |
|  | < 100 vs 100 ≤ | | -0.427 | NS |
|  | < 110 vs 110 ≤ | | -0.122 | NS |
| AUC0–inf (μg·h/mL): continuous variable | | | -0.152 | NS |
| AUC0–inf (μg·h/mL): categorical variable | | |  |  |
|  | < 175 vs. 175 ≤ | | -0.263 | NS |
|  | < 200 vs. 200 ≤ | | -0.873 | NS |
|  | < 225 vs. 225 ≤ | | -0.976 | NS |
|  | < 250 vs. 250 ≤ | | -0.018 | NS |
| AUC0–24 (μg·h/mL): continuous variable | | | 2.521 | – |
| AUC0–24 (μg·h/mL): categorical variable | | |  |  |
|  | < 175 vs. 175 ≤ | | 0.240 | – |
|  | < 200 vs. 200 ≤ | | 2.092 | – |
|  | < 225 vs. 225 ≤ | | -0.007 | NS |
|  | < 250 vs. 250 ≤ | | -0.082 | NS |
| Age (year) | | | -1.058 | NS |
| BMI (kg/m2) | | | -2.192 | NS |
| BSA (m2) | | | -1.477 | NS |
| CLcr (mL/min): continuous variable | | | -0.883 | NS |
| CLcr (mL/min): categorical variable | | |  |  |
|  | < 60 vs. 60 ≤ | | -0.065 | NS |
|  | < 60 vs. 60-90 vs. 90 ≤ | | -1.680 | NS |
| eGFR (mL/min): continuous variable | | | -0.678 | NS |
| eGFR (mL/min): categorical variable | | |  |  |
|  | < 90 vs. 90 ≤ | | -1.089 | NS |
|  | < 60 vs. 60-90 vs. 90 ≤ | | -1.223 | NS |
| BUN (mg/dL) | | | -4.300 | 0.038 |
| NSAIDs | | | -0.360 | NS |
| RAS inhibitor | | | -0.295 | NS |
| Diuretics | | | -0.004 | NS |
| A2 | | |  |  |
| Regimen | | |  |  |
|  | Pemetrexed + Cisplatin vs. Pemetrexed + Carboplatin | | -3.479 | NS |
| Pemetrexed dose (mg) | | | -0.179 | NS |
| Pemetrexed dose per BSA (mg/m2) | | | -0.079 | NS |
| CL (mL/min): continuous variable | | | -0.964 | NS |
| CL (mL/min): categorical variable | | |  |  |
|  | | < 50 vs. 50 ≤ | 1.897 | – |
|  | | < 60 vs. 60 ≤ | 2.746 | – |
|  | | < 70 vs. 70 ≤ | -0.185 | NS |
| Cmax (μg/mL): continuous variable | | | 2.108 | – |
| Cmax (μg/mL): categorical variable | | |  |  |
|  | | < 100 vs. 100 ≤ | -2.618 | NS |
|  | | < 110 vs. 110 ≤ | -0.403 | NS |
| AUC0–inf (μg·h/mL): continuous variable | | | -1.971 | NS |
| AUC0–inf (μg·h/mL): categorical variable | | |  |  |
|  | | < 175 vs. 175 ≤ | -1.286 | NS |
|  | | < 200 vs. 200 ≤ | -1.904 | NS |
|  | | < 225 vs. 225 ≤ | -2.016 | NS |
|  | | < 250 vs. 250 ≤ | -0.028 | NS |
| AUC0–24 (μg·h/mL): continuous variable | | | -1.934 | NS |
| AUC0–24 (μg·h/mL): categorical variable | | |  |  |
|  | | < 175 vs. 175 ≤ | -1.263 | NS |
|  | | < 200 vs. 200 ≤ | -1.491 | NS |
|  | | < 225 vs. 225 ≤ | -0.244 | NS |
|  | | < 250 vs. 250 ≤ | -0.523 | NS |
| Age (year) | | | -3.455 | NS |
| BMI (kg/m2) | | | -4.019 | 0.045 |
| BSA (m2) | | | -1.489 | NS |
| CLcr (mL/min): continuous variable | | | -0.002 | NS |
| CLcr (mL/min): categorical variable | | |  |  |
|  | < 60 vs. 60 ≤ | | -2.548 | NS |
|  | < 60 vs. 60-90 vs. 90 ≤ | | -2.74 | NS |
| eGFR (mL/min): continuous variable | | | -1.046 | NS |
| eGFR (mL/min): categorical variable | | |  |  |
|  | < 90 vs. 90 ≤ | | -0.031 | NS |
|  | < 60 vs. 60-90 vs. 90 ≤ | | -0.070 | NS |
| BUN (mg/dL) | | | -2.881 | NS |
| NSAIDs | | | -0.072 | NS |
| RAS inhibitor | | | -5.147 | 0.023 |
| Diuretics | | | -2.383 | NS |
| B | | |  |  |
| Regimen | | |  |  |
|  | | Pemetrexed + Cisplatin vs. Pemetrexed + Carboplatin | -0.531 | NS |
| Pemetrexed dose (mg) | | | -14.403 | < 0.001 |
| Pemetrexed dose per BSA (mg/m2) | | | -16.665 | < 0.001 |
| CL (mL/min): continuous variable | | | -0.004 | NS |
| CL (mL/min): categorical variable | | |  |  |
|  | | < 50 vs. 50 ≤ | -0.113 | NS |
|  | | < 60 vs. 60 ≤ | -0.036 | NS |
|  | | < 70 vs. 70 ≤ | -0.123 | NS |
| Cmax (μg/mL): continuous variable | | | -1.585 | NS |
| Cmax (μg/mL): categorical variable | | |  |  |
|  | | < 100 vs 100 ≤ | -1.938 | NS |
|  | | < 110 vs 110 ≤ | -0.297 | NS |
| AUC0–inf (μg·h/mL): continuous variable | | | -1.002 | NS |
| AUC0–inf (μg·h/mL): categorical variable | | |  |  |
|  | | < 175 vs. 175 ≤ | -1.867 | NS |
|  | | < 200 vs. 200 ≤ | -2.205 | NS |
|  | | < 225 vs. 225 ≤ | -2.442 | NS |
|  | | < 250 vs. 250 ≤ | 2.700 | – |
| AUC0–24 (μg·h/mL): continuous variable | | | -1.134 | NS |
| AUC0–24 (μg·h/mL): categorical variable | | |  |  |
|  | | < 175 vs. 175 ≤ | -4.406 | 0.036 |
|  | | < 200 vs. 200 ≤ | -2.283 | NS |
|  | | < 225 vs. 225 ≤ | -0.168 | NS |
|  | | < 250 vs. 250 ≤ | -0.596 | NS |
| Age (year) | | | -1.656 | NS |
| BMI (kg/m2) | | | -2.335 | NS |
| BSA (m2) | | | -0.069 | NS |
| CLcr (mL/min): continuous variable | | | -0.022 | NS |
| CLcr (mL/min): categorical variable | | |  |  |
|  | | < 60 vs. 60 ≤ | -0.055 | NS |
|  | | < 60 vs. 60-90 vs. 90 ≤ | -0.090 | NS |
| eGFR (mL/min): continuous variable | | | -0.021 | NS |
| eGFR (mL/min): categorical variable | | |  |  |
|  | | < 90 vs. 90 ≤ | -0.470 | NS |
|  | | < 60 vs. 60-90 vs. 90 ≤ | -0.09 | NS |
| BUN (mg/dL) | | | -2.433 | NS |
| NSAIDs | | | -3.168 | NS |
| RAS inhibitor | | | -0.054 | NS |
| Diuretics | | | -0.054 | NS |

AUC0–inf, area under the plasma concentration‒time curve from time zero to infinity; AUC0–24, area under the plasma concentration‒time curve from time zero to 24 h; BMI, body mass index; BSA, body surface area; BUN, blood urea nitrogen; CL, clearance; CLcr, creatinine clearance; Cmax, maximum plasma concentration; eGFR, estimated glomerular filtration rate; NS, no significant; NSAIDs, non-steroidal anti-inflammatory drugs; OFV, objective function value; RAS, renin‒angiotensin system.

| Model description | | OFV | ΔOFV | *P* value |
| --- | --- | --- | --- | --- |
| Base model | | 630.565 | – | – |
| Forward step | |  |  |  |
|  | Add RAS inhibitors on A2 | 625.418 | -5.147 | 0.023 |
|  | Add AUC0–24 (< 175 vs. 175 ≤) on B | 618.603 | -6.815 | 0.009 |
|  | Add BUN on A1 | 613.932 | -4.671 | 0.031 |
|  | Add BMI on A2 | 614.193 | 0.261 | – |
| Full model | | 613.932 | – | – |
| Backward step | |  |  |  |
|  | Eliminate the RAS inhibitor on A2 | 620.297 | 6.365 | 0.012 |
|  | Eliminate AUC0–24 (< 175 vs. 175 ≤) on B | 620.723 | 6.791 | 0.009 |
|  | Eliminate BUN on A1 | 618.603 | 4.671 | 0.031 |

**Supplementary Table 5. Summary of changes in objective values in stepwise covariate modeling**

AUC0–24, area under the plasma concentration‒time curve from time zero to 24 h; BMI, body mass index; BUN, blood urea nitrogen; OFV, objective function value; RAS, renin‒angiotensin system.

**Supplementary Table 6. Parameter estimates of the final model and bootstrap analysis**

|  |  | Final model | | |  | Bootstrap analysis | |
| --- | --- | --- | --- | --- | --- | --- | --- |
| Parameter | | Estimate | RSE (%) | Shrinkage (%) |  | Median | 95% CI |
| Estimated population mean | |  |  |  |  |  |  |
|  | A1 | 0.334 | 36.2 | – |  | 0.365 | 0.127–0.688 |
|  | A2 | 0.0443 | 63.0 | – |  | 0.0369 | 0.00302–0.863 |
|  | B | 1.39 | 18.5 | – |  | 1.40 | 0.848–3.05 |
| Effect of covariate on A1 | |  |  |  |  |  |  |
|  | BUN | -0.975 | 40.5 | – |  | -0.882 | -1.69 to -0.185 |
| Effect of covariate on A2 | |  |  |  |  |  |  |
|  | RAS inhibitor | 0.0451 | 57.2 | – |  | 0.0699 | 0.0164–0.481 |
| Effect of covariate on B | |  |  |  |  |  |  |
|  | AUC0–24 | 1.44 | 19.0 | – |  | 1.36 | 1.01–2.31 |
| Interindividual variability | |  |  |  |  |  |  |
|  | ωA1 | 0.835 | 23.5 | 15.9 |  | 0.786 | 0.443–1.08 |
|  | ωA2 | 1.96 | 46.6 | 49.8 |  | 2.11 | 0.814–4.56 |
|  | ωB | 0.148 | 103 | 67.9 |  | 0.165 | 0.00235–0.315 |
| Residual variability | |  |  |  |  |  |  |
|  | ε | 0.271 | 12.2 | 11.0 |  | 0.269 | 0.238–0.297 |

AUC0–24, area under the plasma concentration‒time curve from time zero to 24 h; BUN, blood urea nitrogen; CI, confidence interval; RAS, renin‒angiotensin system; RSE, relative standard error.

**Supplementary Table 7. Participant clinical characteristics stratified by the serum BUN level**

|  | Low BUN  (n = 43) | High BUN  (n = 43) | *P* value |
| --- | --- | --- | --- |
| Age (year) | 65.47 ± 7.59 | 71.02 ± 7.15 | < 0.001 |
| Sex (male/female) | 29 (67.4) /14 (32.6) | 33 (76.7) /10 (23.3) | 0.471 |
| Height (cm) | 160.83 ± 9.87 | 162.71 ± 8.27 | 0.340 |
| Weight (kg) | 57.48 ± 11.85 | 59.81 ± 10.10 | 0.331 |
| BMI (kg/ m2) | 22.10 ± 3.61 | 22.58 ± 3.41 | 0.532 |
| BSA (m2) | 1.59 ± 0.19 | 1.64 ± 0.16 | 0.275 |
| Creatinine (mg/dL) | 0.71 ± 0.13 | 0.81 ± 0.18 | 0.005 |
| CLcr (mL/min) | 83.16 ± 27.59 | 71.48 ± 19.29 | 0.025 |
| eGFR (mL/min) | 75.02 ± 21.11 | 67.16 ± 16.24 | 0.056 |
| BUN (mg/dL) | 11.10 ± 2.30 | 19.39 ± 3.64 | < 0.001 |
| Pemetrexed dose (mg) | 755.81 ± 125.27 | 765.47 ± 130.11 | 0.727 |
| Pemetrexed dose per BSA (mg/m2) | 463.28 ± 85.79 | 466.36 ± 55.49 | 0.844 |
| Co-administration |  |  |  |
| Cisplatin/Carboplatin | 25 (58.1) / 18 (41.9) | 30 (30.2) / 13 (69.8) | 0.016 |
| NSAIDs | 9 (20.9) | 14 (32.6) | 0.330 |
| RAS inhibitor | 15 (34.9) | 10 (23.3) | 0.342 |
| Diuretics | 6 (14.0) | 2 (4.7) | 0.265 |

The data are presented as means ± standard deviations or proportions for categorical variables.

BUN was dichotomized by the median of 15 mg/dL.

BMI, body mass index; BSA, body surface area; BUN, blood urea nitrogen; CLcr, creatinine clearance; NSAIDs, non-steroidal anti-inflammatory drugs; RAS, renin‒angiotensin system.


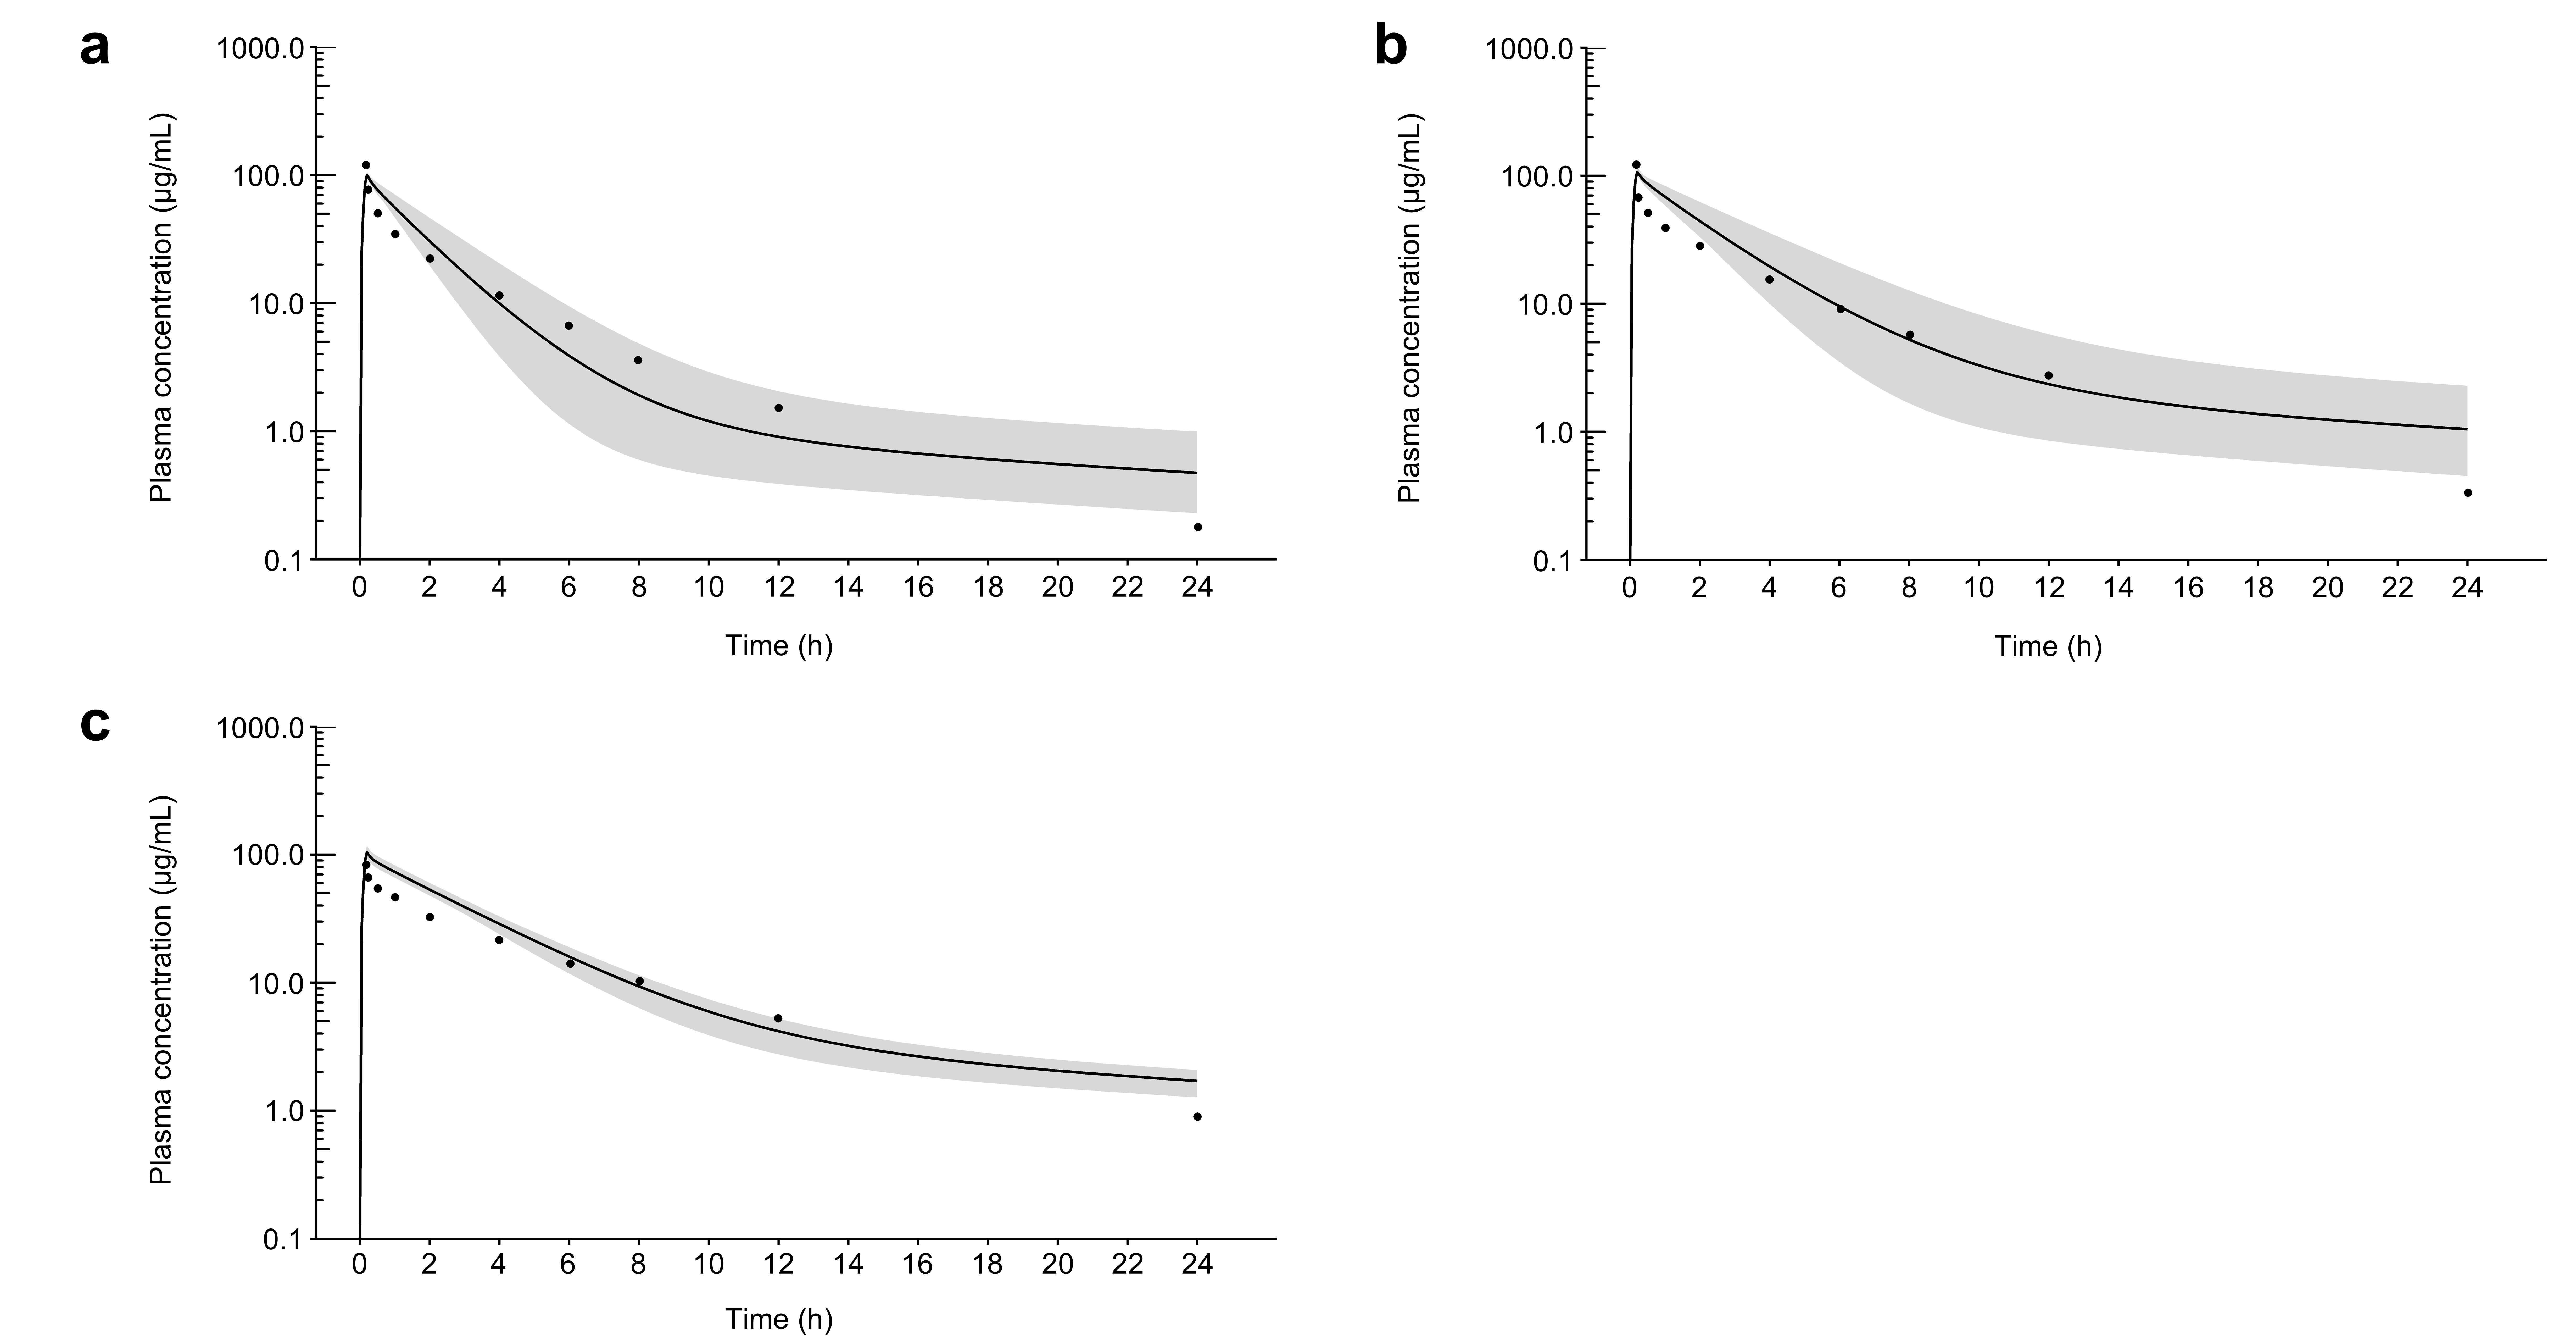


**Supplementary Fig. 1 PBPK model-predicted and observed plasma concentration‒time profiles of pemetrexed in each GFR group**

The predicted and observed plasma concentration‒time profiles of pemetrexed for (a) GFR ≥ 80 mL/min, (b) GFR 60–79 mL/min, and (c) GFR 40–59 mL/min. The solid line and shaded area represent the arithmetic mean and 5th–95th percentile range of the virtual population, respectively. Solid circles plot the observed plasma concentrations. References for the reported observations are given in Table S3.

GFR, glomerular filtration rate; and PBPK, physiologically based pharmacokinetic.





**Supplementary Fig. 2 Correlations between pemetrexed dose and patient characteristics**

Correlation coefficients (r) and *P* values were calculated using Spearman’s rank correlation coefficient test.

BMI, body mass index; BSA, body surface area; BUN, blood urea nitrogen; CLcr, creatinine clearance; and eGFR, estimated glomerular filtration rate.
